# Supplementary material
Source: HighWire-hosted journal article supplement (doi:10.1101/rna.061333.117)
Supplement: Supplemental_Figure_Legends.docx [file Supplemental_Figure_Legends.docx]

**Figure S1: Expression patterns of Dicer and Dicer-related genes during *Oxytricha* development. A)** Domain analysisfor Dicer (*dcr*) and Dicer-related proteins (*Dcl-1, Dcl-2, Dcl-3*) and *rdrp* genes (Contig4554.0 and Contig14356.0) in *Oxytricha trifallax* wild type cells. Normalized RNA-seq reads for **B)** Dicer and **C)** RdRP genes (Swart et al. 2013) are shown at the indicated developmental time-points post mixing of mating types to begin conjugation (Fed, vegetatively growing cells).

**Figure S2: Construction of *dcl-1* and *rdrp* mutant strains**.

PCR **(A, D)** and RT-PCR **(B, C)** across MDSs flanking the targeted IES for *dcl-1* and *rdrp*. WT lane is a MIC-enriched nuclear fraction isolated from wild-type cells, since otherwise only the MAC band is visible after PCR from whole-cell DNA. MIC and MAC sized bands are indicated, where the MIC-sized product contains the IES. +RT and –RT refer to RT-PCR reactions with or without RT enzyme added. Sequence maps are shown in **C)** for *dcl-1* and **F)** for *rdrp*, showing the injected small RNA oligonucleotide sequences and the resulting IES-retaining clones in the F1 progeny. The resulting stop codon due to frameshift in *dcl-1* is marked with a red bar. Highlighted nucleotides indicate differences from the reference sequence due to strain differences or sequencing errors.

**Figure S3. Small RNA characteristics in *dcl-141* and *rdrp13*cells.**

Small RNA length profile for **A)** *dcl-141* and **B)** *rdrp13*. C) Genome-wide sRNA mapping for *dcl-141***. D)** Comparison of *dcl-1* sRNAs and **E)** WT sRNAs to **F)** genome annotation demonstrates sRNA mapping to both coding and non-coding regions in the MAC, with a slight bias for coding regions and slight bias against subtelomeric regions, as for WT 21nt sRNAs.

**Figure S4: Metagene mapping of sRNAs to single- and two-gene chromosomes suggest a possible promoter bias. A)** Metagene analysis of sRNA mapping reveals a 5’-bias for single gene chromosomes (15,237 two-telomere containing, single-gene contigs oriented at the transcription start site and length normalized to 1000bp between telomeres). Close examination of 200 bp windows upstream and downstream of transcription start sites (TSS) and stop codons (both labeled zero, respectively, at start and end of reading frame arrows) confirms a 5’-gene bias for **B)** single-gene, as well as two-gene, chromosomes with reading frames in **C)** tandem (n=1450), **D)** convergent (n=976) or, **E)** divergent (n=550) orientation. In **D** and **E**, the longer reading frame is in the sense orientation. Blue represents sense and red represents antisense strand mapping. Brackets represent other sequence and purple bars represent telomeres.

**Figure S5:** Characteristics of MIC-mapping sRNAs. A) Length distribution shows a peak at 22nt compared to 21nt for MAC-mapping sRNAs. B) sRNA mapping to MIC genomic elements. Reduced levels of C) MIC-gene mapping and D) MIC-satellite mapping sRNAs in *rdrp13* as compared to WT or *dcl-1* strains. *p*-values are provided on the graphs or are indicated if < 10-5. E) Differential gene expression analysis using edgeR shows increased expression of MIC-satellites in *rdrp13* versus WT.

**Figure S6: No correlation between vegetative sRNA copy number and RNA expression.** Comparison of sRNA levels and RNA-seq values from similar vegetatively growing (fed) populations reveals a poor correlation between the two datasets. R2, Pearson correlation coefficient.

**Figure S7: dsRNA feeding leads to increased copy number of somatic genes.** **A)** RT-PCR for dsRNA target loci (normalized to an empty vector control, “Empty”) reveals no more than 2-fold reduced mRNA levels following dsRNA feeding. **B)** *dcl-1*-dependent increase in DNA copy number of representative MAC targets upon dsRNA feeding in WT but not *dcl-1* cells. **C)** Absolute DNA quantification of mitochondrial rDNA in 5ng of total DNA from two WT strains and *dcl-1* shows relatively constant rDNA levels. **D)** Relative DNA copy number of two unrelated MAC genes, *Actin* and *TEBP-alpha*, does not change upon sRNA injection. **E)** MAC DNA copy number comparison between two WT strains shows good correspondence between them.

**Figure S8: *dcl-1* and *rdrp* mutants display slower growth rates. A)** Growth curve for wt, *dcl-141* and *rdrp25* cells showing slower growth rate and high lethality in mutants. **B)** Growth rate, measured as fold-change in number of cells 24hrs post seeding, reveals a slower doubling rate for *dcl-1* and *rdrp* mutants.

**Figure S9: Nuclear fragments in *dcl-1* are not likely due to replication defects.** *dcl-1* cells fixed without DNA denaturation show BrdU signal in the replication band (top panel), whereas cells with nuclear fragments do not (bottom panel), suggesting that the nuclear fragments are generated independently of replication.

**Figure S10: Differential gene expression analysis using edgeR.** log2 fold change of MAC gene expression between WT and **A)** *dcl-1* or **B)** *rdrp*. Genes marked with red dots are differentially expressed in mutants versus WT (*p*-value < 0.05).
