# Supplementary material
Source: HighWire-hosted journal article supplement (doi:10.1101/rna.061333.117)
Supplement: Supplemental_File_1.xlsx [file Supplemental_File_1.xlsx]

## Sheet: wt_dcl1_MAC
	wt-A	dcl1-A	wt-B	dcl1-B	logFC	logCPM	PValue	FDR	Homolog
Contig9927.0.g7	7	288	33	515	4.9827	2.29966	3.27e-06	0.00468591	Asna1 (Arsenite pump driving ATPase)
Contig15729.0	7	280	33	515	4.96122	2.27941	3.48e-06	0.00468591	Asna1 (Arsenite pump driving ATPase)
Contig19649.0	19	217	28	931	4.79673	2.64111	8.57e-06	0.00769408
Contig20554.0	42	523	94	2246	4.64895	3.91118	1.31e-05	0.00882786
Contig10869.0	15	176	29	578	4.41308	2.10219	2.04e-05	0.0101023
Contig15813.0	526	14	407	13	-4.77313	2.34737	2.28e-05	0.0101023	Superoxide Dismutase
Contig21984.0	8	95	17	268	4.22832	1.09146	2.82e-05	0.0101023
Contig12063.0	309	5930	718	6607	4.24147	6.42101	3e-05	0.0101023

## Sheet: wt_rdrp_MAC
	wt-A	wt-B	rdrp-A	rdrp-B	logFC	logCPM	PValue	FDR	Homolog
Contig15813.0.g105.t1	526	407	16	12	-6.30436	2.96315	2.10633e-11	6.38848e-08	SOD	common
Contig4245.0.g40.t1	526	407	18	12	-6.20078	2.96463	4.25909e-11	6.45891e-08	SOD
Contig10869.0.g102.t1	15	29	778	905	4.23824	2.67457	1.31513e-09	1.32959e-06		common
Contig15729.0.g46.t1	7	33	535	1058	4.43881	2.56129	1.22119e-08	7.40772e-06	Asna1	common
Contig9927.0.g7.t1	7	33	535	1058	4.43881	2.56129	1.22119e-08	7.40772e-06	Asna1	common
Contig21984.0.g61.t1	8	17	379	374	3.92112	1.57881	2.29202e-08	1.15862e-05		common
Contig10910.0.g97.t1	620	1166	154	136	-3.63875	3.77331	7.47546e-08	3.23901e-05	Ser/Thr phosphatase
Contig4473.0.g87.t1	14	30	549	528	3.6269	2.09375	1.13517e-07	4.3037e-05
Contig14214.0.g51.t1	52	77	6	14	-3.77969	-0.0899699	1.52715e-07	5.1465e-05
Contig12063.0.g61.t1	309	718	8625	13227	3.42337	6.37363	2.47298e-07	7.50053e-05		common
Contig17063.0.g75.t1	112	210	24	38	-3.41456	1.27187	3.48871e-07	9.61933e-05	Bud31, cell cycle progression factor
Contig9719.0.g88.t1	49	97	17	11	-3.36012	0.0833546	6.09669e-07	0.000154094	YHYH domain protein
Contig19441.0.g40.t1	556	698	75	14	-4.88376	3.30283	1.90298e-06	0.00044398	MORN repeat protein
Contig18539.0.g62.t1	133765	72599	13472	21578	-3.94523	10.9569	2.33761e-06	0.000506427	Collagen-like surface protein
Contig12619.0.g67.t1	6	17	186	207	3.14305	0.736938	2.61941e-06	0.000529645	U2 snRNP
Contig6540.0.g48.t1	15	72	789	720	3.30759	2.59223	3.90574e-06	0.000733254	Pescadillo BRCT domain protein
Contig2296.0.g37.t1	15	72	785	716	3.29995	2.58543	4.1099e-06	0.000733254	Pescadillo BRCT domain protein
Contig19465.0.g67.t1	14	16	268	348	3.22482	1.33766	6.18012e-06	0.000979303	Glycosyl hydrolase protein
Contig18732.0.g32.t1	6	12	126	180	3.06636	0.396784	6.44642e-06	0.000979303	Arginine methyltransferase interacting protein
Contig18819.0.g83.t1	1302	605	51	157	-4.64502	4.17672	6.45765e-06	0.000979303	Thioredoxin
Contig20623.0.g12.t1	1018	1133	199	317	-3.25817	4.22489	7.02353e-06	0.0010144	Lipase
Contig20612.0.g29.t1	7	38	453	300	3.27315	1.64008	1.45822e-05	0.00201036
Contig1573.0.g55.t1	205	196	42	60	-3.20206	1.79295	1.55151e-05	0.00204596
Contig20822.0.g90.t1	93	68	18	17	-3.46404	0.429411	1.66273e-05	0.00207519	Alba
Contig21067.0.g44.t1	94	171	1388	3702	3.18107	4.27721	1.71051e-05	0.00207519	Apolipoprotein D
Contig19549.0.g12.t1	2131	603	175	123	-4.66485	4.79344	2.15519e-05	0.002421
Contig18527.0.g6.t1	14	33	301	292	2.69104	1.35027	3.22513e-05	0.00346468	Vacuolar cation channel
Contig947.1.g9.t1	119	170	44	50	-2.72145	1.26361	3.31275e-05	0.00346468
Contig22722.0.g27.t1	180	98	23	34	-3.65165	1.32001	3.51979e-05	0.00355851	Histone 3
Contig16263.0.g40.t1	84	60	19	10	-3.55375	0.250494	3.85594e-05	0.00374403	Protein kinase domain protein
Contig10122.0.g34	32835	38765	8220	16441	-2.73315	9.33752	4.42714e-05	0.00406894
Contig13639.0.g32.t1	36	39	10	12	-2.91499	-0.743236	5.34412e-05	0.00476727
Contig4701.0.g33.t1	2302	4439	29049	44195	2.40202	8.2379	6.61859e-05	0.00549504	Histone 3
Contig17626.0.g13.t1	25	57	16	9	-2.65125	-0.688985	6.66939e-05	0.00549504	NFX1 type Zn finger protein
Contig4433.0.g3.t1	234	652	146	142	-2.53484	2.77213	6.70348e-05	0.00549504
Contig22470.0.g95.t1	344	296	104	74	-3.07047	2.53364	7.60511e-05	0.00607008	Ras family GTPase
Contig16456.0.g82.t1	36	39	10	14	-2.79686	-0.722981	8.42794e-05	0.00634156	Ammonium transporter
Contig23134.0.g65.t1	36	39	10	14	-2.79686	-0.722981	8.42794e-05	0.00634156
Contig18844.0.g103.t1	8	37	216	298	2.653	1.14135	8.5725e-05	0.00634156	RRM domain containing protein
Contig19453.0.g89.t1	317	705	183	195	-2.41412	3.05691	0.000102159	0.00737733	Thaumatin domain containing protein
Contig12894.0.g97.t1	106	244	61	70	-2.38967	1.4856	0.000114817	0.0080986
Contig9146.0.g84.t1	6262	352	186	133	-5.98821	6.18956	0.000123505	0.00851342	Unknown
Contig718.1.g104.t1	3203	7497	39305	61820	2.25354	8.72593	0.000132757	0.0087573	Ankyrin repeat domain protein
Contig14980.0.g110.t1	3203	7497	39302	61820	2.25349	8.72589	0.000132818	0.0087573	Histone 2B
Contig12676.0.g71.t1	8	21	150	153	2.43067	0.46273	0.000137719	0.00888725	Acetyl CoA transferase
Contig23021.0.g52.t1	67	204	35	61	-2.41669	1.04432	0.000194462	0.0118486	Cellulase-like domain protein
Contig19649.0.g19.t1	19	28	192	518	2.78927	1.54155	0.000195328	0.0118486	Unknown
Contig18769.0.g73.t1	1031	866	293	370	-2.78088	4.17259	0.000202962	0.0120703	Zn finger protein
Contig13168.0.g80.t1	49	71	24	28	-2.29365	0.0227482	0.000253734	0.0143668	Phosphatase
Contig16275.0.g39.t1	11	48	350	259	2.54179	1.41815	0.000255789	0.0143668	tRNA synthetase
Contig20719.0.g14.t1	146	98	40	40	-2.90658	1.16125	0.000268365	0.0147991	Unknown
Contig4736.0.g46.t1	893	1135	316	499	-2.47584	4.19972	0.000280997	0.0150077	Ubiquitin hydrolase
Contig20554.0.g60.t1	42	94	525	837	2.32297	2.5356	0.000282044	0.0150077	Unknown
Contig16794.0.g8.t1	569	1257	300	453	-2.27803	3.925	0.000319626	0.0158922
Contig21293.0.g79.t1	53	172	33	53	-2.2885	0.784464	0.000343442	0.0165343	Protein kinase domain protein
Contig2413.0.g94.t1	87	84	26	42	-2.55079	0.594546	0.000361937	0.0171524
Contig11900.0.g25.t1	811	893	270	428	-2.48912	3.98457	0.000382241	0.0178359	Ubiquitin hydrolase
Contig21053.0.g53.t1	903205	553643	166659	382566	-2.78446	13.8529	0.000399128	0.018068
Contig22455.0.g75.t1	761	1244	246	548	-2.44162	4.1172	0.000408818	0.0181349
Contig18795.0.g32.t1	14	28	161	255	2.28162	0.894091	0.000413205	0.0181349
Contig18140.0.g100.t1	20033	35139	8692	17285	-2.16739	8.93494	0.000443929	0.0189639
Contig21181.0.g62.t1	1257	1078	299	588	-2.67854	4.48344	0.000505387	0.0205875
Contig22211.0.g103.t1	49	68	23	31	-2.22062	0.0100181	0.000515527	0.0205875	Phosphatase
Contig15208.0.g22.t1	88	85	31	43	-2.43901	0.633165	0.000515875	0.0205875
Contig12954.0.g54.t1	8	39	213	206	2.32446	0.920684	0.00052501	0.0206799
Contig1193.0.g2.t1	9	45	210	276	2.33182	1.10896	0.000540826	0.0210298
Contig22647.0.g3.t1	6	99	640	843	3.16874	2.56287	0.00060423	0.0229079	Isocitrate Dehydrogenase
Contig465.1.g36.t1	532	645	165	344	-2.3965	3.433	0.000680023	0.0251583
Contig22162.0.g72.t1	6286	6671	2809	3230	-2.29771	6.96504	0.000688524	0.0251583	Proteasome maturation factor
Contig4220.0.g51.t1	79485	103862	36193	61265	-2.06952	10.7713	0.000699312	0.0251583
Contig22996.0.g96.t1	2910	6797	30929	44703	1.97888	8.36296	0.000711513	0.0251583	Histone 2B
Contig16208.0.g93.t1	526	641	159	344	-2.4016	3.41827	0.000715798	0.0251583	Zn finger/FHA
Contig22695.0.g49.t1	2906	6797	30861	44629	1.97712	8.36058	0.000720165	0.0251583	H2B
Contig1090.0.g48.t1	1262	670	313	376	-2.86293	4.30113	0.000721653	0.0251583
Contig14602.0.g98.t1	6	25	115	136	2.12963	0.243752	0.000837389	0.0288614
Contig9394.0.g26.t1	38	30	9	17	-2.63576	-0.784969	0.00087861	0.0290569
Contig22220.0.g57.t1	27	64	323	432	2.074	1.75769	0.000882265	0.0290569
Contig7749.0.g62.t1	1301	2097	613	1000	-2.16933	4.93283	0.000923489	0.0290569
Contig16968.0.g76.t1	3315	3513	1440	1748	-2.29833	6.03948	0.000929284	0.0290569
Contig13328.0.g5.t1	11	196	1004	2153	3.27945	3.59733	0.00101388	0.030871
Contig21162.0.g42.t1	30	74	22	30	-1.95966	-0.212118	0.00101851	0.030871
Contig19276.0.g31.t1	364	303	95	190	-2.51395	2.68037	0.00102801	0.030871
Contig8398.0.g93.t1	12	34	9	10	-2.19221	-1.43641	0.0010916	0.0321136
Contig20092.0.g94.t1	5371	8264	2097	4604	-2.14819	6.9587	0.00138211	0.039177
Contig16494.0.g117.t1	5113	6912	2947	3460	-2.03656	6.83592	0.0014511	0.0403777
Contig6730.0.g75.t1	1054	1624	718	642	-2.05261	4.62308	0.00159536	0.0435921
Contig9358.0.g54.t1	2405	4529	22777	29069	1.86547	7.8488	0.00161309	0.0436832
Contig21473.0.g35.t1	13	32	178	160	1.95547	0.686868	0.00166169	0.044601
Contig10453.0.g8.t1	13135	11021	5760	6940	-2.19122	7.94775	0.00173664	0.0462038
Contig22121.0.g34.t1	22	110	29	16	-2.31469	-0.0584143	0.00178038	0.0469556

## Sheet: wt_rdrp_TBEs
	rdrp-A	wt-A	rdrp-B	wt-B	logFC	logCPM	PValue	FDR
ctg7180000069234_1196_6495_TBE2_type1	8097	17	5877	27	-10.6184	11.1153	9.98334e-08	1.4181e-05
ctg7180000087805_19744_24895_TBE2_type1	6828	6	4454	14	-11.4934	10.8557	1.59337e-07	1.4181e-05
ctg7180000067553_14734_21288_TBE1	8291	32	5899	46	-9.82669	11.148	3.52866e-07	1.59973e-05
ctg7180000068128_78011_79594_TBE3	8285	32	5880	46	-9.82536	11.1467	3.59489e-07	1.59973e-05

## Sheet: wt_rdrp_MIC Satellites
	wt-B	wt	rdrp-B	rdrp-A	logFC	logCPM	PValue	FDR
scf7180000089918_7_913	8	8	52	74	3.14372	9.28916	4.57e-06	0.000373843
scf7180000085512_1_2021	8	16	94	119	3.41858	10.0127	1.94e-05	0.000373843
scf7180000092997_1_854	7	16	91	109	3.3971	9.90097	2.02e-05	0.000373843
scf7180000079743_5705_6031	7	15	90	108	3.43268	9.88324	2.15e-05	0.000373843
scf7180000084939_2_364	7	15	90	108	3.43268	9.88324	2.15e-05	0.000373843
scf7180000084939_2887_3247	7	15	90	108	3.43268	9.88324	2.15e-05	0.000373843
scf7180000083288_726_1135	7	15	90	108	3.43268	9.88324	2.15e-05	0.000373843
scf7180000083288_2161_2571	7	15	90	108	3.43268	9.88324	2.15e-05	0.000373843
scf7180000083288_7917_8325	7	15	90	108	3.43268	9.88324	2.15e-05	0.000373843
scf7180000083288_9405_9774	7	15	90	108	3.43268	9.88324	2.15e-05	0.000373843
scf7180000086499_896_1306	7	15	90	108	3.43268	9.88324	2.15e-05	0.000373843
scf7180000086499_3340_3748	7	15	90	108	3.43268	9.88324	2.15e-05	0.000373843
scf7180000083733_2684_3093	7	15	90	108	3.43268	9.88324	2.15e-05	0.000373843
scf7180000083733_3902_4311	7	15	90	108	3.43268	9.88324	2.15e-05	0.000373843
scf7180000083733_5123_5532	7	15	90	108	3.43268	9.88324	2.15e-05	0.000373843
scf7180000083733_6343_6813	7	15	90	108	3.43268	9.88324	2.15e-05	0.000373843
scf7180000083554_3270_3683	7	15	90	108	3.43268	9.88324	2.15e-05	0.000373843
scf7180000083553_2569_2938	7	15	90	108	3.43268	9.88324	2.15e-05	0.000373843
scf7180000082507_2306_2716	7	15	90	108	3.43268	9.88324	2.15e-05	0.000373843
scf7180000082507_4688_5155	7	15	90	108	3.43268	9.88324	2.15e-05	0.000373843
scf7180000082507_5961_6371	7	15	90	108	3.43268	9.88324	2.15e-05	0.000373843
scf7180000082507_7208_7616	7	15	90	108	3.43268	9.88324	2.15e-05	0.000373843
scf7180000082507_8426_8836	7	15	90	108	3.43268	9.88324	2.15e-05	0.000373843
scf7180000082507_9651_10060	7	15	90	108	3.43268	9.88324	2.15e-05	0.000373843
scf7180000084151_4739_4943	7	15	90	108	3.43268	9.88324	2.15e-05	0.000373843
scf7180000086567_869_1263	7	15	90	108	3.43268	9.88324	2.15e-05	0.000373843
scf7180000086567_2090_2499	7	15	90	108	3.43268	9.88324	2.15e-05	0.000373843
scf7180000086567_3308_3714	7	15	90	108	3.43268	9.88324	2.15e-05	0.000373843
scf7180000086567_4520_4889	7	15	90	108	3.43268	9.88324	2.15e-05	0.000373843
scf7180000094264_168_643	7	15	90	108	3.43268	9.88324	2.15e-05	0.000373843
scf7180000074221_40740_41021	7	16	90	108	3.38309	9.88784	2.15e-05	0.000373843
scf7180000085224_19_2319	8	16	94	115	3.37762	9.97644	2.38e-05	0.000394057
deg7180000050450_993_1489	14	45	201	213	3.14035	10.9681	2.41e-05	0.000394057
scf7180000081909_965_3435	6	18	44	69	2.61927	9.21724	2.8e-05	0.000444678
scf7180000086471_3999_4615	39	131	544	605	3.13773	12.4893	0.000120893	0.0018652
scf7180000076825_4336_4820	14	71	135	182	2.43247	10.7581	0.000662582	0.00993872
scf7180000094040_2_12328	16	114	320	244	2.50279	11.375	0.000719619	0.0105025
scf7180000068985_6_1897	20	60	190	172	2.42537	10.8049	0.000755454	0.0107354
scf7180000076801_2639_3726	26	136	312	356	2.54469	11.7809	0.000843433	0.0116783
scf7180000080124_3919_4779	23	133	311	311	2.46273	11.6368	0.0010667	0.0140492
scf7180000079703_5475_6332	23	133	311	311	2.46273	11.6368	0.0010667	0.0140492
scf7180000079532_3149_10974	11	64	177	125	2.29563	10.4627	0.00109445	0.0140715
